# Supplementary material for: Temporal regulation of HIF-1 and NF-κB in hypoxic hepatocarcinoma cells
Source: PubMed Central journal article supplement (PMC4496226; doi:10.18632/oncotarget.3352), 2015-03-19
Supplement: oncotarget-06-9409-s001.pdf [file oncotarget-06-9409-s001.pdf]

## SUPPLEMENTARY FIGURES AND TABLES

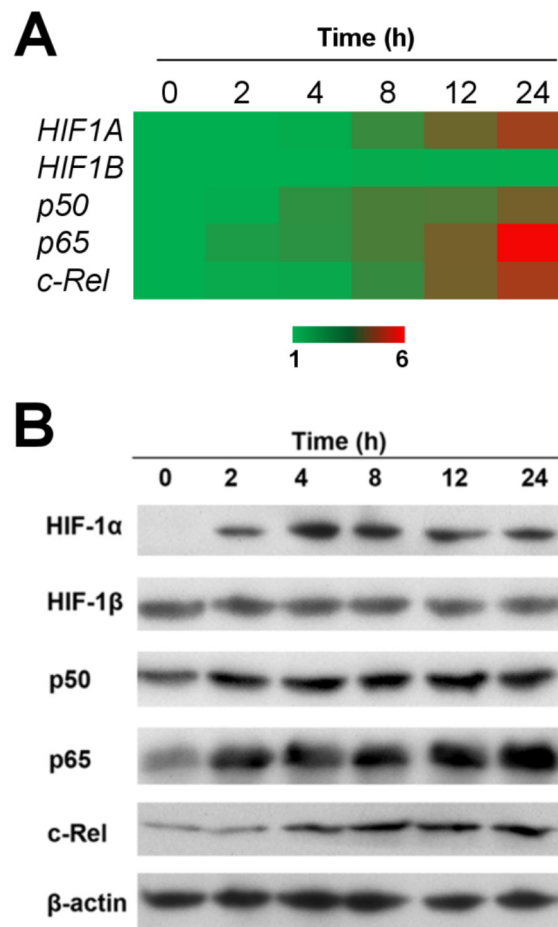

**Supplementary Figure S1: Temporal expression of HIF-1 $\alpha$  in Huh7 cells under short-term and prolonged hypoxia.** Huh7 cells were exposed to 1% O<sub>2</sub> for 0–24 h and assessed the mRNA (A) and protein (B) expressions of HIF-1 $\alpha$ , HIF-1 $\beta$ , NF- $\kappa$ B-p50, p65 and c-Rel. The results in (A) were expressed as the mean of n=4 independent experiments and expressed with heatmap.

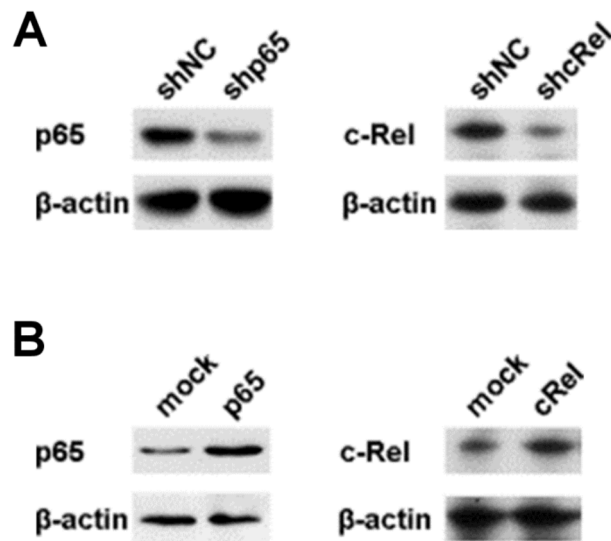

**Supplementary Figure S2: Knockdown and overexpression of NF- $\kappa$ B in HepG2 cells.** (A) HepG2 cells were transfected with shNC, shp65, or shcRel for 48 h. The protein expressions of p65, c-Rel and  $\beta$ -actin were determined with western-blot. (B) HepG2 cells were transfected with mock, p65, or cRel for 48 h. The protein expressions of p65, c-Rel and  $\beta$ -actin were determined with western-blot.

A

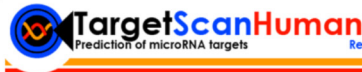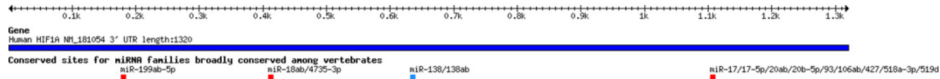

|                                    | predicted consequential pairing of target region (top) and miRNA (bottom) | seed match | site type contribution | 3' pairing contribution | local AU contribution | position contribution | TA contribution | SPS contribution | context score | context score percentile | conserved branch length | P <sub>cr</sub> |
|------------------------------------|---------------------------------------------------------------------------|------------|------------------------|-------------------------|-----------------------|-----------------------|-----------------|------------------|---------------|--------------------------|-------------------------|-----------------|
| Position 177-183 of HIF1A 3' UTR   | 5' ...CAUCCUUUUUUUGSACACUUUU...<br>3' CUUGCCCAUCAGACUUGGACCC              | 7mer-m8    | -0.120                 | 0.021                   | 0.007                 | -0.037                | 0.005           | -0.032           | -0.16         | 71                       | 2.102                   | 0.60            |
| hsa-miR-199a-5p                    |                                                                           |            |                        |                         |                       |                       |                 |                  |               |                          |                         |                 |
| Position 177-183 of HIF1A 3' UTR   | 5' ...CAUCCUUUUUUUGSACACUUUU...<br>3' CUUGCCCAUCAGACUUGGACCC              | 7mer-m8    | -0.120                 | 0.030                   | 0.007                 | -0.037                | 0.005           | -0.032           | -0.15         | 68                       | 2.102                   | 0.60            |
| hsa-miR-199b-5p                    |                                                                           |            |                        |                         |                       |                       |                 |                  |               |                          |                         |                 |
| Position 409-415 of HIF1A 3' UTR   | 5' ...AUCAUUUUUUUUUUUUUUUUUUU...<br>3' UACAGAUUAAACUCUGGAAA               | 7mer-m8    | -0.120                 | -0.016                  | -0.144                | -0.004                | -0.016          | -0.032           | -0.33         | 94                       | 2.012                   | 0.58            |
| hsa-miR-4735-3p                    |                                                                           |            |                        |                         |                       |                       |                 |                  |               |                          |                         |                 |
| Position 409-415 of HIF1A 3' UTR   | 5' ...AUCAUUUUUUUUUUUUUUUUUUU...<br>3' GAUAGACUGGACUUCACUGGAAU            | 7mer-m8    | -0.120                 | 0.012                   | -0.144                | -0.004                | -0.016          | -0.032           | -0.30         | 93                       | 2.012                   | 0.58            |
| hsa-miR-18a                        |                                                                           |            |                        |                         |                       |                       |                 |                  |               |                          |                         |                 |
| Position 409-415 of HIF1A 3' UTR   | 5' ...AUCAUUUUUUUUUUUUUUUUUUU...<br>3' GAUUGACUGGACUUCACUGGAAU            | 7mer-m8    | -0.120                 | 0.021                   | -0.144                | -0.004                | -0.016          | -0.032           | -0.30         | 92                       | 2.012                   | 0.58            |
| hsa-miR-18b                        |                                                                           |            |                        |                         |                       |                       |                 |                  |               |                          |                         |                 |
| Position 632-638 of HIF1A 3' UTR   | 5' ...AAUUCUUUUUUUUUUUUUUUUUU...<br>3' GCGGACUUAAGUUUGUGGUGCA             | 7mer-1A    | -0.074                 | 0.001                   | -0.035                | 0.019                 | 0.006           | -0.066           | -0.15         | 60                       | 1.906                   | 0.69            |
| hsa-miR-138                        |                                                                           |            |                        |                         |                       |                       |                 |                  |               |                          |                         |                 |
| Position 1104-1110 of HIF1A 3' UTR | 5' ...AAUUGUUUUUUUUUUUUUUUUUU...<br>3' GAUUGACUGGACUUCACUGGAAU            | 7mer-m8    | -0.120                 | 0.003                   | -0.075                | -0.032                | 0.025           | 0.020            | -0.18         | 90                       | 1.735                   | 0.62            |
| hsa-miR-20b                        |                                                                           |            |                        |                         |                       |                       |                 |                  |               |                          |                         |                 |
| Position 1104-1110 of HIF1A 3' UTR | 5' ...AAUUGUUUUUUUUUUUUUUUUUU...<br>3' GAUUGACUGGACUUCACUGGAAU            | 7mer-m8    | -0.120                 | 0.003                   | -0.075                | -0.032                | 0.025           | 0.020            | -0.18         | 90                       | 1.735                   | 0.62            |
| hsa-miR-20a                        |                                                                           |            |                        |                         |                       |                       |                 |                  |               |                          |                         |                 |
| Position 1104-1110 of HIF1A 3' UTR | 5' ...AAUUGUUUUUUUUUUUUUUUUUU...<br>3' GAUUGACUGGACUUCACUGGAAU            | 7mer-m8    | -0.120                 | 0.021                   | -0.075                | -0.032                | 0.025           | 0.020            | -0.16         | 88                       | 1.735                   | 0.62            |
| hsa-miR-93                         |                                                                           |            |                        |                         |                       |                       |                 |                  |               |                          |                         |                 |
| Position 1104-1110 of HIF1A 3' UTR | 5' ...AAUUGUUUUUUUUUUUUUUUUUU...<br>3' GAUUGACUGGACUUCACUGGAAU            | 7mer-m8    | -0.120                 | 0.021                   | -0.075                | -0.032                | 0.025           | 0.020            | -0.16         | 87                       | 1.735                   | 0.62            |
| hsa-miR-17                         |                                                                           |            |                        |                         |                       |                       |                 |                  |               |                          |                         |                 |
| Position 1104-1110 of HIF1A 3' UTR | 5' ...AAUUGUUUUUUUUUUUUUUUUUU...<br>3' GAUUGACUGGACUUCACUGGAAU            | 7mer-m8    | -0.120                 | 0.021                   | -0.075                | -0.032                | 0.025           | 0.020            | -0.16         | 87                       | 1.735                   | 0.62            |
| hsa-miR-196a                       |                                                                           |            |                        |                         |                       |                       |                 |                  |               |                          |                         |                 |
| Position 1104-1110 of HIF1A 3' UTR | 5' ...AAUUGUUUUUUUUUUUUUUUUUU...<br>3' GAUUGACUGGACUUCACUGGAAU            | 7mer-m8    | -0.120                 | 0.021                   | -0.075                | -0.032                | 0.025           | 0.020            | -0.16         | 87                       | 1.735                   | 0.62            |
| hsa-miR-106b                       |                                                                           |            |                        |                         |                       |                       |                 |                  |               |                          |                         |                 |
| Position 1104-1110 of HIF1A 3' UTR | 5' ...AAUUGUUUUUUUUUUUUUUUUUU...<br>3' GUGAGAUUUUUUUUUUUUUUUUU            | 7mer-m8    | -0.120                 | 0.040                   | -0.075                | -0.032                | 0.025           | 0.020            | -0.14         | 84                       | 1.735                   | 0.62            |
| hsa-miR-519d                       |                                                                           |            |                        |                         |                       |                       |                 |                  |               |                          |                         |                 |

B

| miRNA Symbol | Binding sequence              | Distance from TSS |
|--------------|-------------------------------|-------------------|
| miR-199a-5p  | tgGGGAActcctc (NF-κB p50/p65) | -4785             |
|              | GGAAAtccca (c-Rel)            | -3030             |
|              | gtgtCACGTgacaac (HIF-1)       | -1549             |
| miR-17       | GGAAAtccca (c-Rel)            | -2483             |
|              |                               | -3098             |
| miR-18a      | GGAAAtccca (c-Rel)            | -2483             |
|              |                               | -3098             |
| miR-20a      | GGAAAtccca (c-Rel)            | -2483             |
|              |                               | -3098             |
| miR-93       | GGAAAtccca (c-Rel)            | -36               |
|              |                               | -2167             |
| miR-106b     |                               | -4313             |
|              | GGAAAtccca (c-Rel)            | -263              |
|              |                               | -2394             |
|              |                               | -4540             |

Supplementary Figure S3: HIF-1 upstream and c-Rel downstream miRNAs. (A) Targetscan predicted binding of miRNAs with conserved 3'UTR sites of *HIF1A*. (B) miRGen predicted c-Rel downstream and HIF-1 upstream miRNAs.

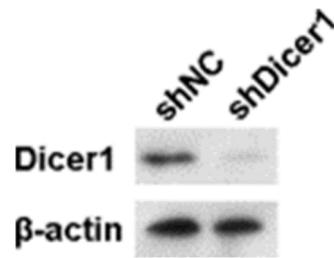

**Supplementary Figure S4: Knockdown of Dicer1 in HepG2 cells.** HepG2 cells were transfected with shNC or shDicer1 for 48 h. The protein expressions of Dicer1 and  $\beta$ -actin were determined with western-blot.

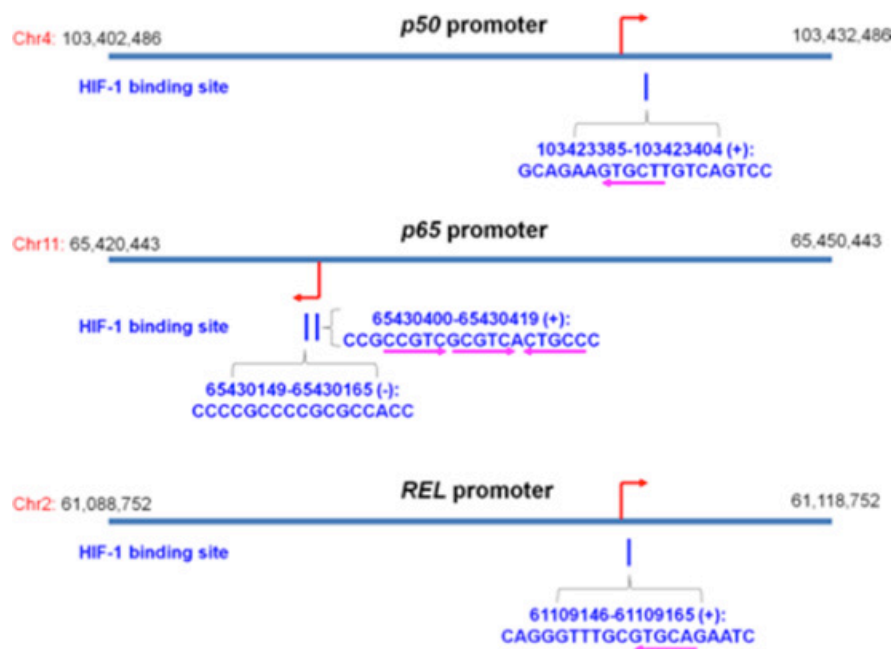

**Supplementary Figure S5: HIF-1 binding site on NF- $\kappa$ B promoters.** Vista predicted HIF-1 binding sites (blue) in the promoters of p50, p65, and c-Rel. Pink arrows show HRE sequences. Red arrow, transcription start site; +, positive strand.

Supplementary Table 1: Primers for target genes

| Gene              | Genebank ID  | Forward               | Reverse              | Product Size |
|-------------------|--------------|-----------------------|----------------------|--------------|
| <i>ACTB</i>       | NM_001101    | catccgcaaagacctgtacg  | cctgcttctgatccacatc  | 218          |
| <i>HIF1A</i>      | NM_001243084 | tccaagaagccctaacgtgt  | tgatcgctggctgctgtaa  | 180          |
| <i>ARNT/HIF1B</i> | NM_001197325 | aagccgtcttctcactga    | tgctgccaaccattcagac  | 160          |
| <i>p50</i>        | NM_003998    | aatgggtggagtctgggaagg | tctgacgttctctgact    | 226          |
| <i>p65</i>        | NM_001145138 | acaagtggccattgtgtcc   | acgttctctcaatccggt   | 169          |
| <i>cRel</i>       | NM_001291746 | acctctgccttctcaagct   | gatgacgcttccattccgac | 213          |
| <i>Dicer1</i>     | NM_001195573 | tggtccacgagtcacaatca  | cagccaatcgtacacagctc | 209          |

## Qiagen Catlog No.

|             |            |
|-------------|------------|
| U6-2        | MS00033740 |
| miR-199a-5p | MS00006741 |
| miR-18a     | MS00031514 |
| miR-20a     | MS00003199 |
| miR-93      | MS00003346 |
| miR-17      | MS00029274 |
| miR-106b    | MS00003402 |

Supplementary Table 2: Plasmid vectors information

|             | Origene Catlog No. |
|-------------|--------------------|
| shNC        | TR30007            |
| shp65       | TL302038           |
| shcRel      | TL309876           |
| shHIF1A     | TG320380           |
| shDicer1    | TL308001           |
| mock        | PS100071           |
| p65         | RC220780L2         |
| cRel        | RC211878L2         |
|             | ABM Catlog No.     |
| mock-miR    | m003               |
| miR-93      | mh41079            |
| miR-199a-5p | mh40255            |
| miR-17      | mh41055            |
| miR-18a     | mh41057            |
